# Supplementary material for: DNA topoisomerase inhibition with the HIF inhibitor acriflavine promotes transcription of lncRNAs in endothelial cells
Source: PubMed Central journal article supplement — Mol Ther Nucleic Acids. 2022 Jan 25;27:1023–35. doi: 10.1016/j.omtn.2022.01.016 (PMC8844413; doi:10.1016/j.omtn.2022.01.016), 2022-01-25
Supplement: mmc1.pdf [file mmc1.pdf]

OMTN, Volume 27

## **Supplemental information**

### **DNA topoisomerase inhibition with the HIF inhibitor acriflavine promotes transcription of lncRNAs in endothelial cells**

**Sandra Seredinski, Frederike Boos, Stefan Günther, James A. Oo, Timothy Warwick, Judit Izquierdo Ponce, Felix F. Lillich, Ewgenij Proschak, Stefan Knapp, Ralf Gilsbach, Beatrice Pflüger-Müller, Ralf P. Brandes, and Matthias S. Leisegang**

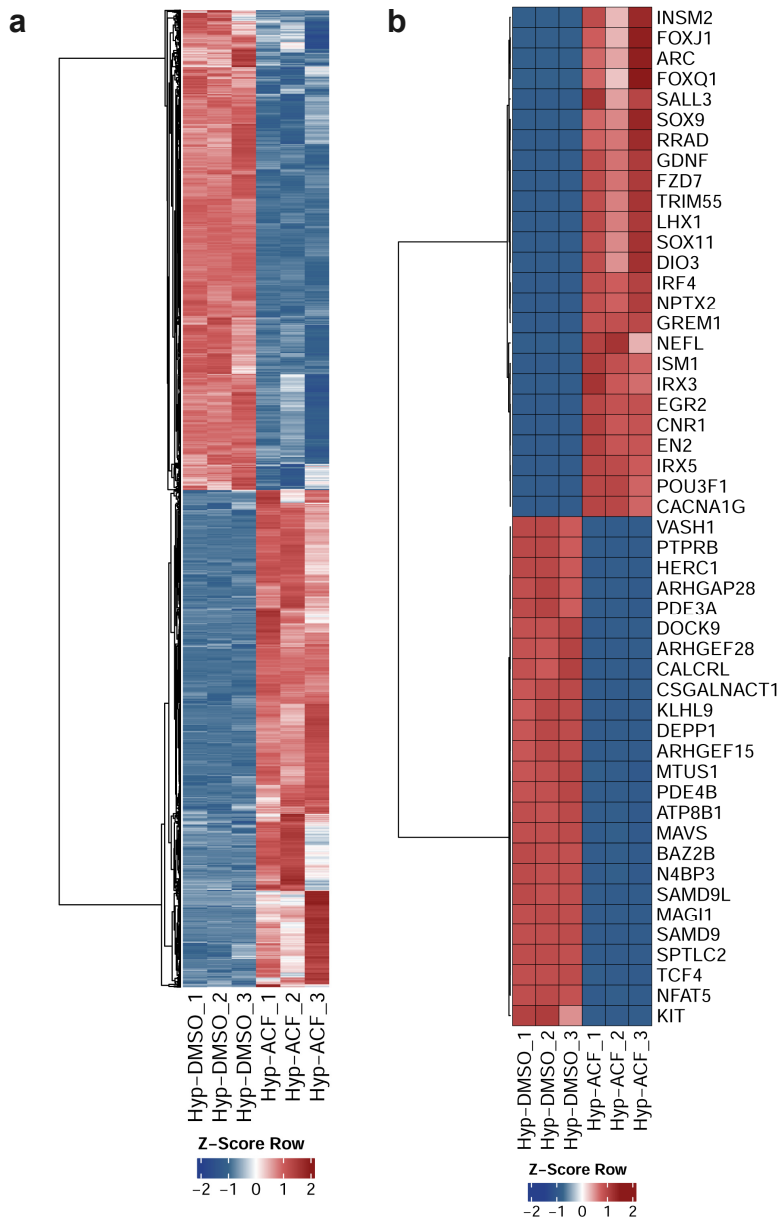

**Supplemental Fig. 1: a**, Heat-map of RNA-Seq of HUVEC treated with hypoxia (1% O<sub>2</sub>, 16h, Hyp) and with or without ACF (10μM, 16h) showing significantly (padj <0.05, log2FC>±0.3) altered protein-coding genes. DMSO served as negative control. 3 replicates are shown. Z-score represents up- (red, positive value) or downregulation (blue, negative values) of genes. **b**, Heat-map as in a. Top25 up- and downregulated protein-coding genes were shown.

Gene set enrichment (FDR<0.2, Top 10 up/down Sets)  
DMSO\_vs\_Acridflavin\_Gene\_Ontology\_FDR

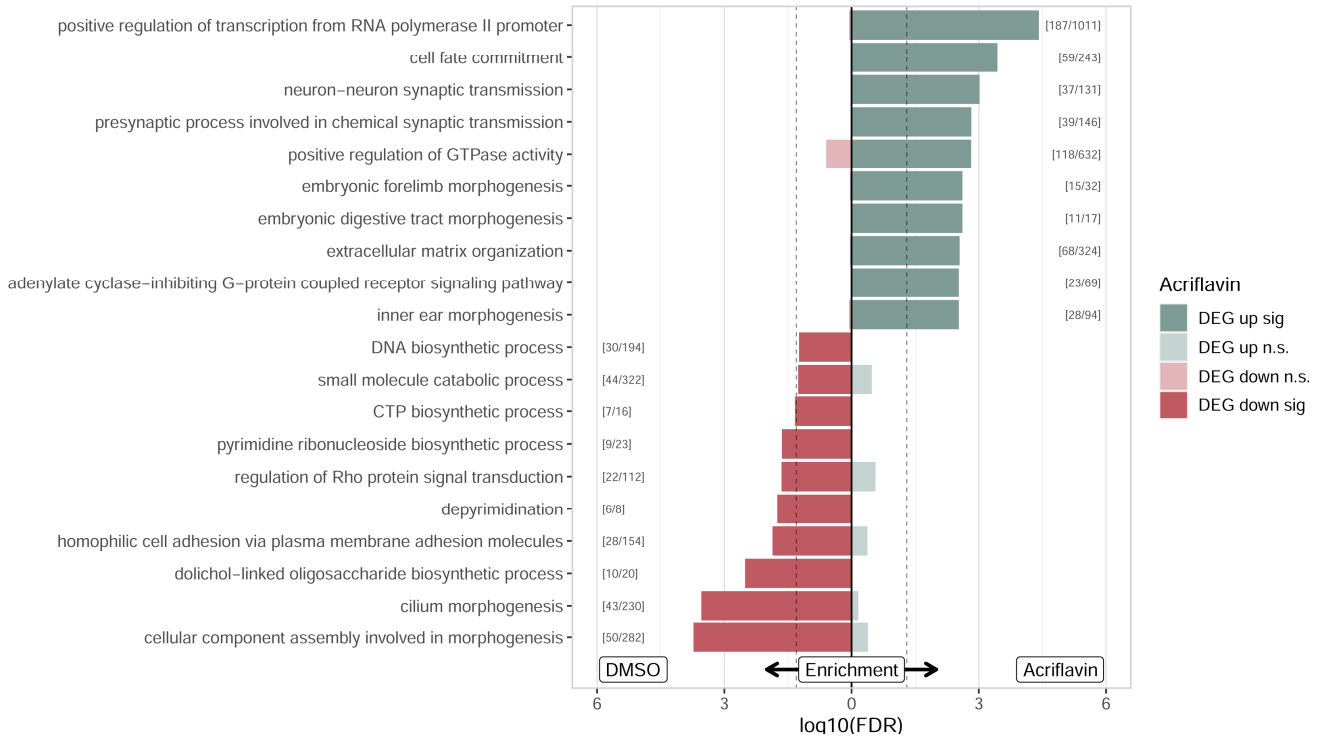

**Supplemental Fig. 2:** Gene ontology set enrichment of all significantly regulated genes from the RNA-Seq in HUVECs treated with ACF (10µM, 16h). DMSO served as negative control. FDR < 0.2, Top10 up/down sets are shown. Error bars are defined as mean +/- SEM. \*P<0.05.

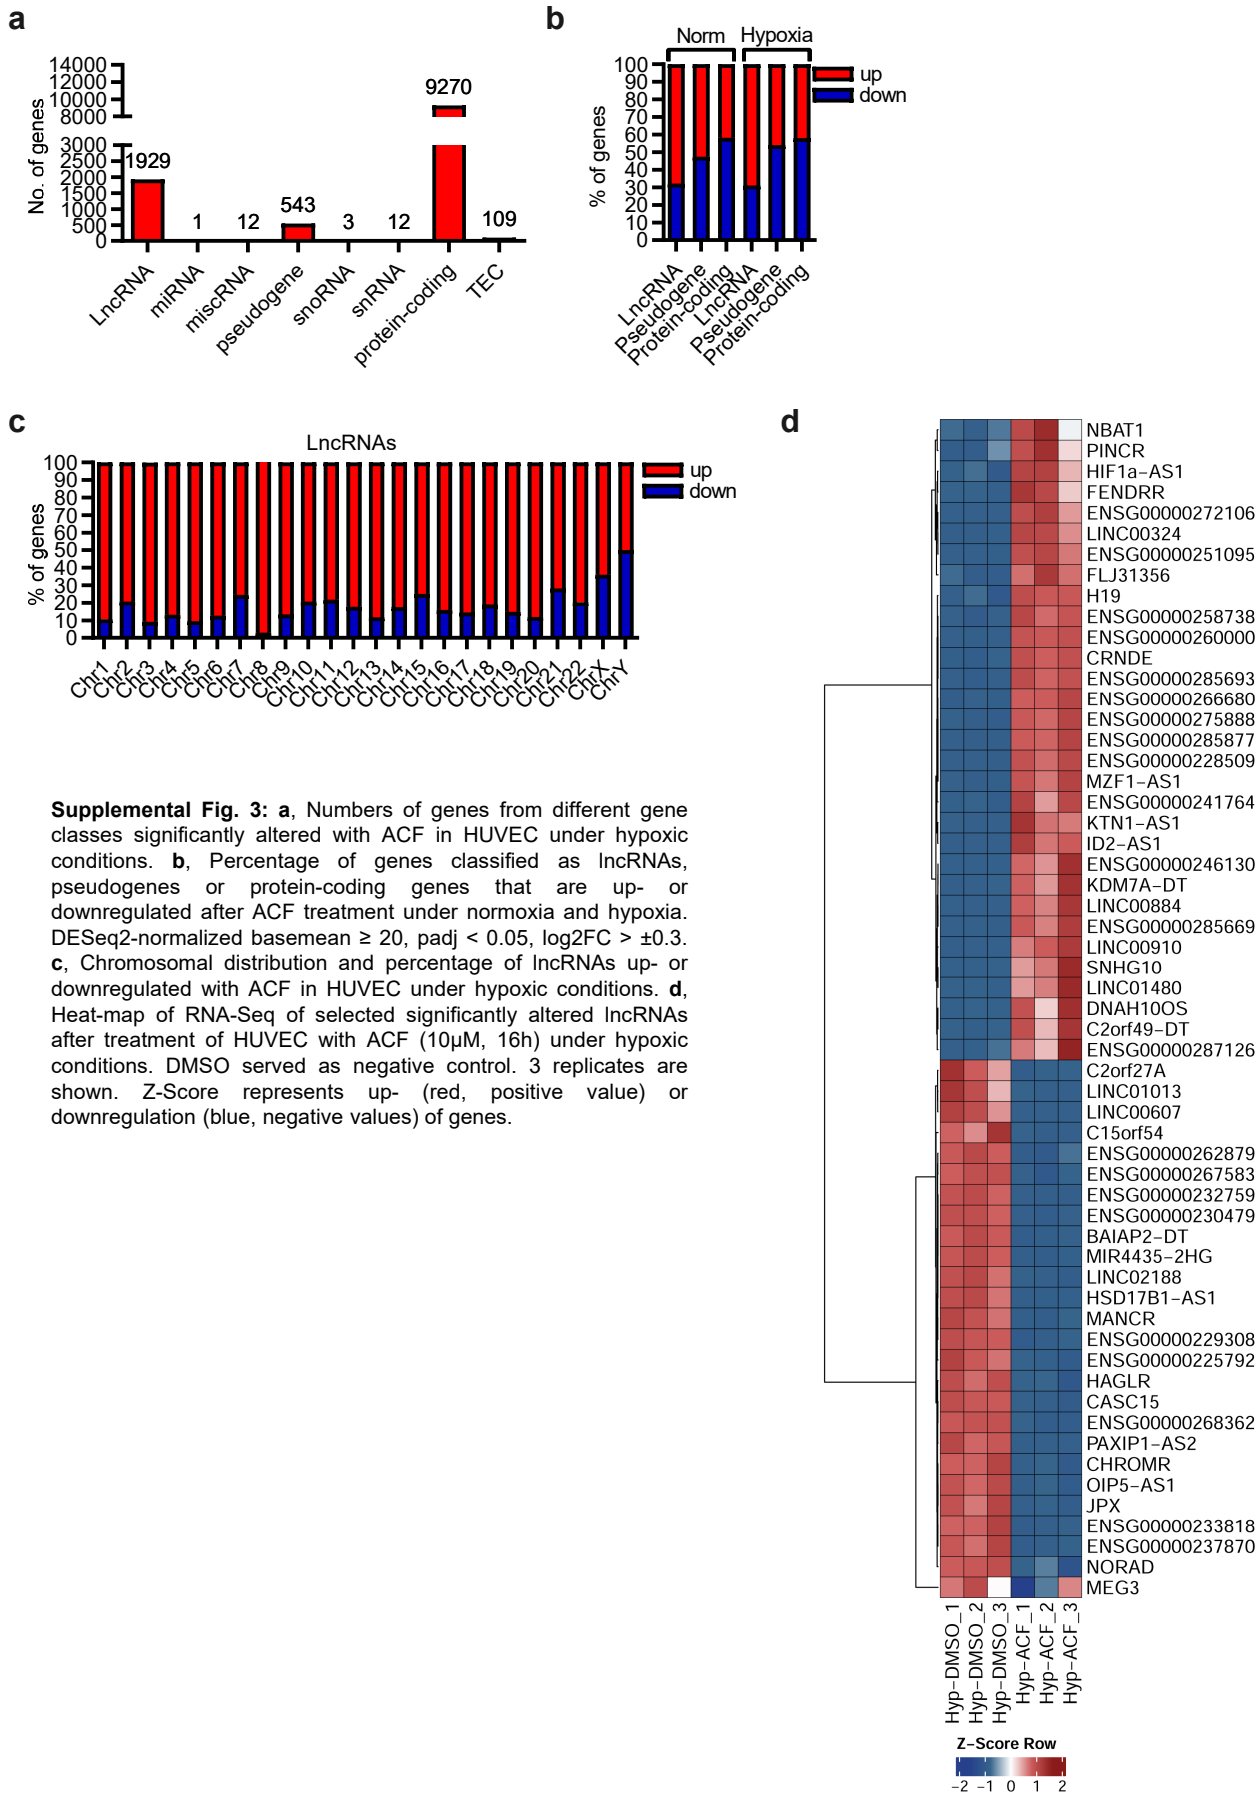

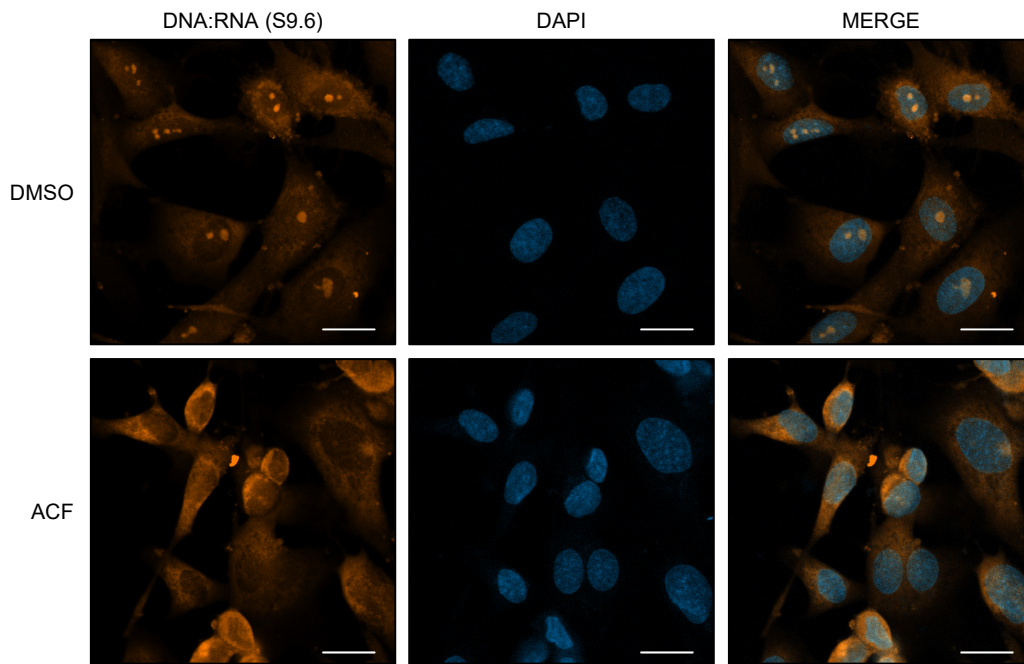

**Supplemental Fig. 4:** Immunofluorescence with an antibody against DNA:RNA Hybrids (S9.6 antibody) in HUVEC treated with ACF (10 $\mu$ M, 16h) or DMSO. Nuclei were stained with DAPI. Scale bar indicates 20 $\mu$ m.
